# Supplementary material
Source: ML conference proceedings conference paper supplement (https://proceedings.neurips.cc/paper_files/paper/2009/hash/fec8d47d412bcbeece3d9128ae855a7a-Abstract.html)
Supplement: Supplementary file 1 [file fec8d47d412bcbeece3d9128ae855a7a-Supplemental.zip]

Archive with 1 entries (1 files):
- extra/NIPS2009_0982_extra.pdf
